# Supplementary material for: Aerosol hygroscopicity and its link to chemical composition in coastal atmosphere of Mace Head: marine and continental air masses
Source: Copernicus journal article supplement (doi:10.5194/acp-2019-839), 2019-11-13
Supplement: Supplementary file 1 [file acp-2019-839-supplement.pdf]

Supporting information on

## **Aerosol hygroscopicity and its link to chemical composition in coastal atmosphere of Mace Head: Marine and continental air masses**

Wei Xu,<sup>1,2</sup> Jurgita Ovadnevaite,<sup>1</sup> Kirsten N. Fossom,<sup>1</sup> Chunshui Lin,<sup>2</sup> Ru-Jin Huang,<sup>\*2,3</sup> Colin O'Dowd,<sup>\*1</sup> Darius Ceburnis,<sup>1</sup>

<sup>1</sup>School of Physics, Ryan Institute's Centre for Climate & Air Pollution Studies, and Marine Renewable Energy Ireland, National University of Ireland Galway, University Road, H91CF50 Galway, Ireland

<sup>2</sup>State Key Laboratory of Loess and Quaternary Geology, Center for Excellence in Quaternary Science and Global Change, and Key Laboratory of Aerosol Chemistry and Physics, Institute of Earth Environment, Chinese Academy of Sciences, 710061 Xi'an, China

<sup>3</sup>Open Studio for Oceanic-Continental Climate and Environment Changes, Pilot National Laboratory for Marine Science and Technology (Qingdao), Qingdao 266061, China

\*Correspondence to Ru-Jin Huang ([rujin.huang@ieecas.cn](mailto:rujin.huang@ieecas.cn)) and Colin O'Dowd ([colin.odowd@nuigalway.ie](mailto:colin.odowd@nuigalway.ie))

Table S1. Summary of start and end time of each event.

Table S2. Averaged chemical composition during each event.

Table S3. Hygroscopicity GF (mean  $\pm$ standard deviation) for each event.

Figure S1. Diurnal variation of GFs of C1& C2 (left) and M1&M2 (right).

Figure S2. Time series of the number fraction of NH mode in black (GF<1.11), LH mode in green, (1.11<GF<1.33), MH mode in red(1.33<GF<1.85) and SS mode in brown (GF>1.85) of aerosols with pre-selected dry diameter of unfiltered and filtered M1 events.

Figure S3. Examples of GF-PDFs with GF spread factor > 0.2: (a) GF spread factor 0.21; (b)GF spread factor 0.27.

Figure S4. Comparison of chemical composition between C & M events and those data with GF spread factor > 0.2. Lines represent median concentration, boxes represent 25- 75% percentile, and whiskers represent 10 -90% percentile.

Table S1. Summary of start and end time of each event.

| Event | Starting date& time | End date& time   |
|-------|---------------------|------------------|
| C1    | 2009.01.01 00:00    | 2009.01.10 18:00 |
| C2    | 2009.03.17 00:00    | 2009.03.22 12:00 |
| M1    | 2009.01.15 16:00    | 2009.01.24 12:00 |
| M2    | 2009.03.06 18:00    | 2009.03.12 12:00 |

Table S2. Averaged chemical composition during each event.

|                                      | C1                | C2                | M1                | M2                |
|--------------------------------------|-------------------|-------------------|-------------------|-------------------|
| Sea-salt ( $\mu\text{g m}^{-3}$ )    | 0.17 $\pm$ 0.22   | 0.13 $\pm$ 0.17   | 0.63 $\pm$ 0.28   | 0.58 $\pm$ 0.23   |
| Organics ( $\mu\text{g m}^{-3}$ )    | 1.99 $\pm$ 1.54   | 6.00 $\pm$ 8.57   | 0.02 $\pm$ 0.02   | 0.08 $\pm$ 0.07   |
| Nitrate ( $\mu\text{g m}^{-3}$ )     | 0.92 $\pm$ 1.03   | 4.06 $\pm$ 3.90   | 0.01 $\pm$ 0.007  | 0.01 $\pm$ 0.006  |
| nss-sulfate ( $\mu\text{g m}^{-3}$ ) | 1.47 $\pm$ 0.70   | 2.04 $\pm$ 1.64   | 0.08 $\pm$ 0.05   | 0.16 $\pm$ 0.17   |
| Ammonium ( $\mu\text{g m}^{-3}$ )    | 0.72 $\pm$ 0.49   | 1.82 $\pm$ 1.52   | 0.002 $\pm$ 0.004 | 0.003 $\pm$ 0.03  |
| MSA ( $\mu\text{g m}^{-3}$ )         | 0.007 $\pm$ 0.007 | 0.006 $\pm$ 0.004 | 0.001 $\pm$ 0.001 | 0.002 $\pm$ 0.002 |
| Black carbon ( $\text{ng m}^{-3}$ )  | 500 $\pm$ 377     | 518 $\pm$ 499     | 10.1 $\pm$ 3.3    | 9.9 $\pm$ 3.7     |

Table S3. Hygroscopicity GF (mean  $\pm$  standard deviation) for each event.

| D0     | C1              | C2              | M1              | M2              |
|--------|-----------------|-----------------|-----------------|-----------------|
| 35 nm  | 1.32 $\pm$ 0.09 | 1.42 $\pm$ 0.13 | 1.87 $\pm$ 0.17 | 1.85 $\pm$ 0.18 |
| 50 nm  | 1.34 $\pm$ 0.08 | 1.47 $\pm$ 0.12 | 2.00 $\pm$ 0.14 | 1.97 $\pm$ 0.20 |
| 75 nm  | 1.38 $\pm$ 0.12 | 1.53 $\pm$ 0.12 | 2.04 $\pm$ 0.09 | 2.00 $\pm$ 0.19 |
| 110 nm | 1.45 $\pm$ 0.14 | 1.59 $\pm$ 0.13 | 2.07 $\pm$ 0.08 | 2.00 $\pm$ 0.15 |
| 165 nm | 1.53 $\pm$ 0.14 | 1.65 $\pm$ 0.13 | 2.11 $\pm$ 0.07 | 2.05 $\pm$ 0.15 |

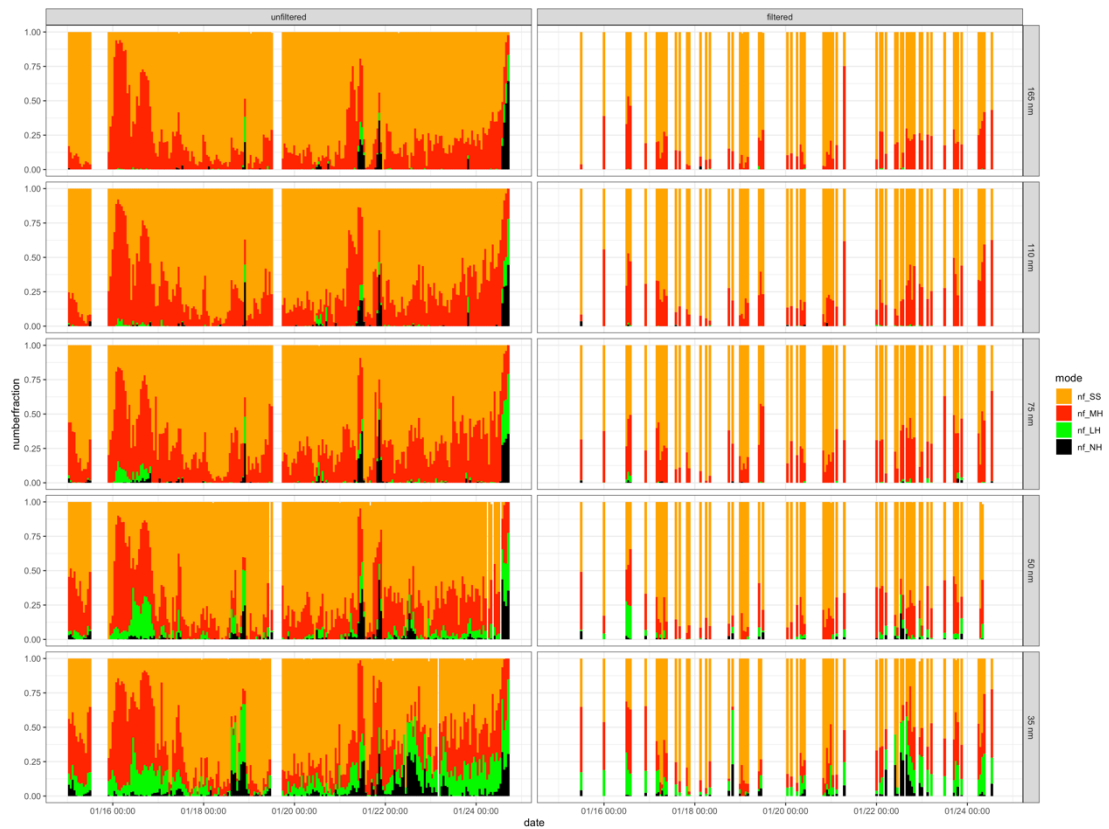

**Figure S1. Time series of the number fraction of NH mode in black ( $GF < 1.11$ ), LH mode in green, ( $1.11 < GF < 1.33$ ), MH mode in red ( $1.33 < GF < 1.85$ ) and SS mode in brown ( $GF > 1.85$ ) of aerosols with pre-selected dry diameter of unfiltered and filtered M1 events.**

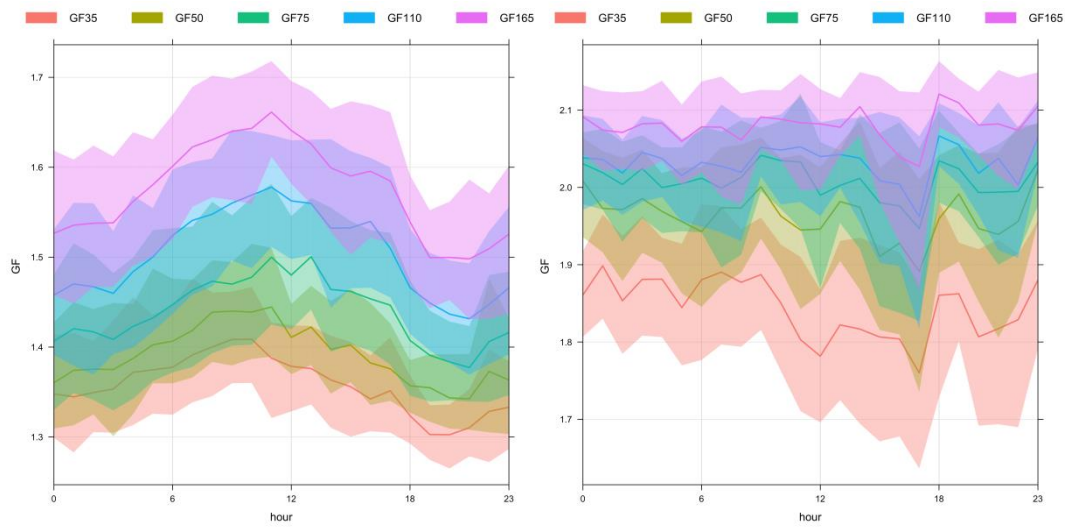

**Figure S2. Diurnal variation of GF of C1&C2 air masses (left), M1&M2 (right).**

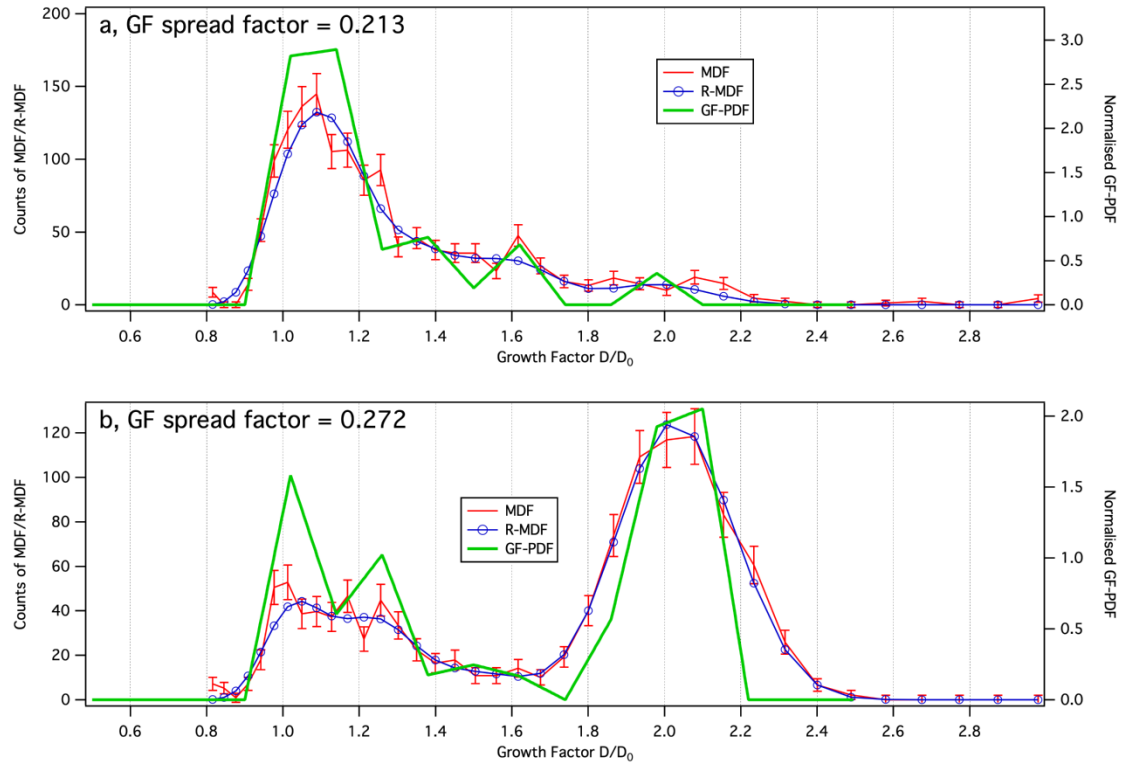

**Figure S3. Examples of GF-PDFs with GF spread factor > 0.2: (a) GF spread factor 0.213; (b)GF spread factor 0.272.**

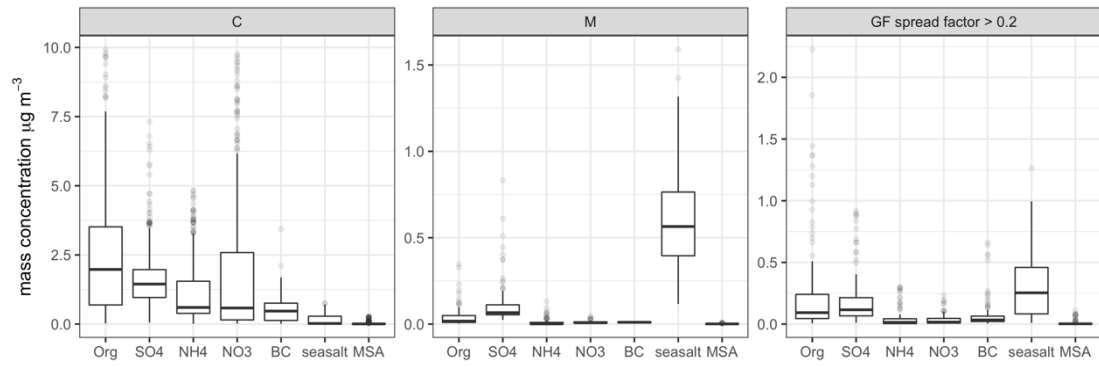

**Figure S4. Comparison of chemical composition between C, M and those data with GF spread factor > 0.2. Lines represent median concentration, boxes represent 25 - 75 % percentile, whiskers represent 1.5\*IQR from the boxes (where the IQR is the interquartile range). Data beyond the end of whisker are plotted individually.**
